# Supplementary material
Source: PubMed Central journal article supplement (PMC7863903)
Supplement: supp_RA120.012543_158047_1_supp_609560_qhxpyl.pdf [file supp_RA120.012543_158047_1_supp_609560_qhxpyl.pdf]

**A**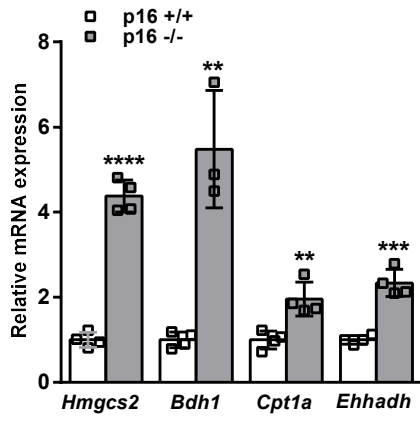

**Figure S1. P16-deficiency increases fatty acid catabolism genes in primary hepatocytes.** (A) *Hmgcs2*, *Bdh1*, *Cpt1a*, *Ehhadh* relative mRNA expression measured by QPCR in p16<sup>+/+</sup> and p16<sup>-/-</sup> primary hepatocytes.

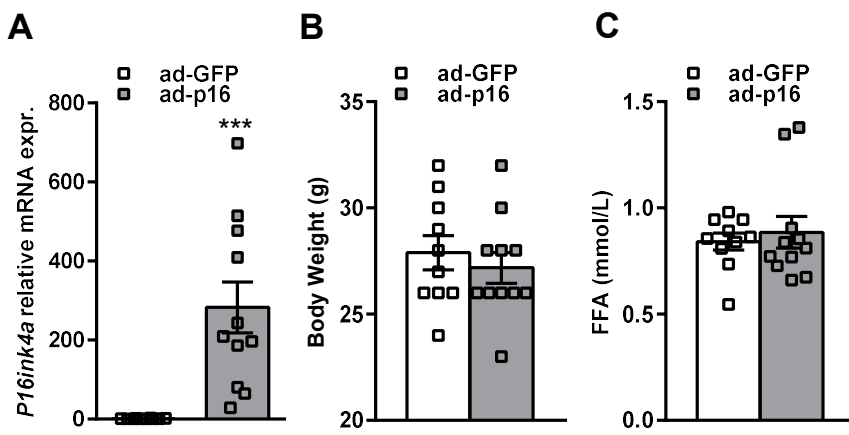

**Figure S2. P16 overexpression has no impact on body weight and plasma FFA.** (A-C) 12-week-old male mice were injected with adenovirus GFP (ad-GFP) (n=10) or adenovirus p16 (ad-p16) (n=11) (A) hepatic *P16ink4a* relative mRNA expression was measured by QPCR and (B) Body weight and (C) Circulating free fatty acids were measured after an overnight fasting. All values are expressed as means  $\pm$  SEM. \* compared to ad-GFP, t-test: \*\*\* p<0.001.

**A**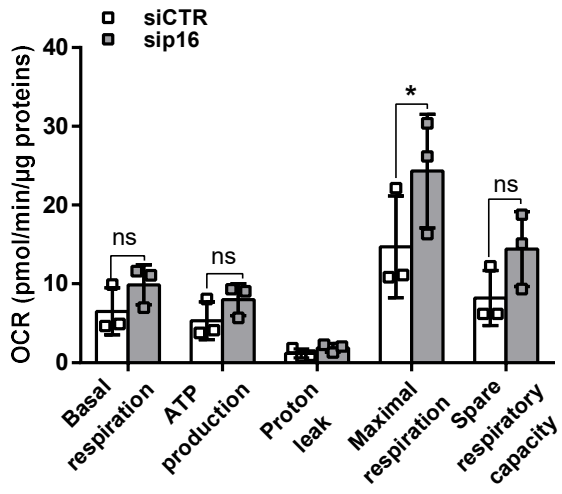

**Figure S3. P16 silencing increases maximal respiration in IHH cells.** (A) Bar graph of OCR measured by Seahorse apparatus in IHH cells transfected with siCTR or *sip16*. All values are expressed as means  $\pm$  SD. \* compared to siCTR; one-way ANOVA: \*  $p < 0.05$ .

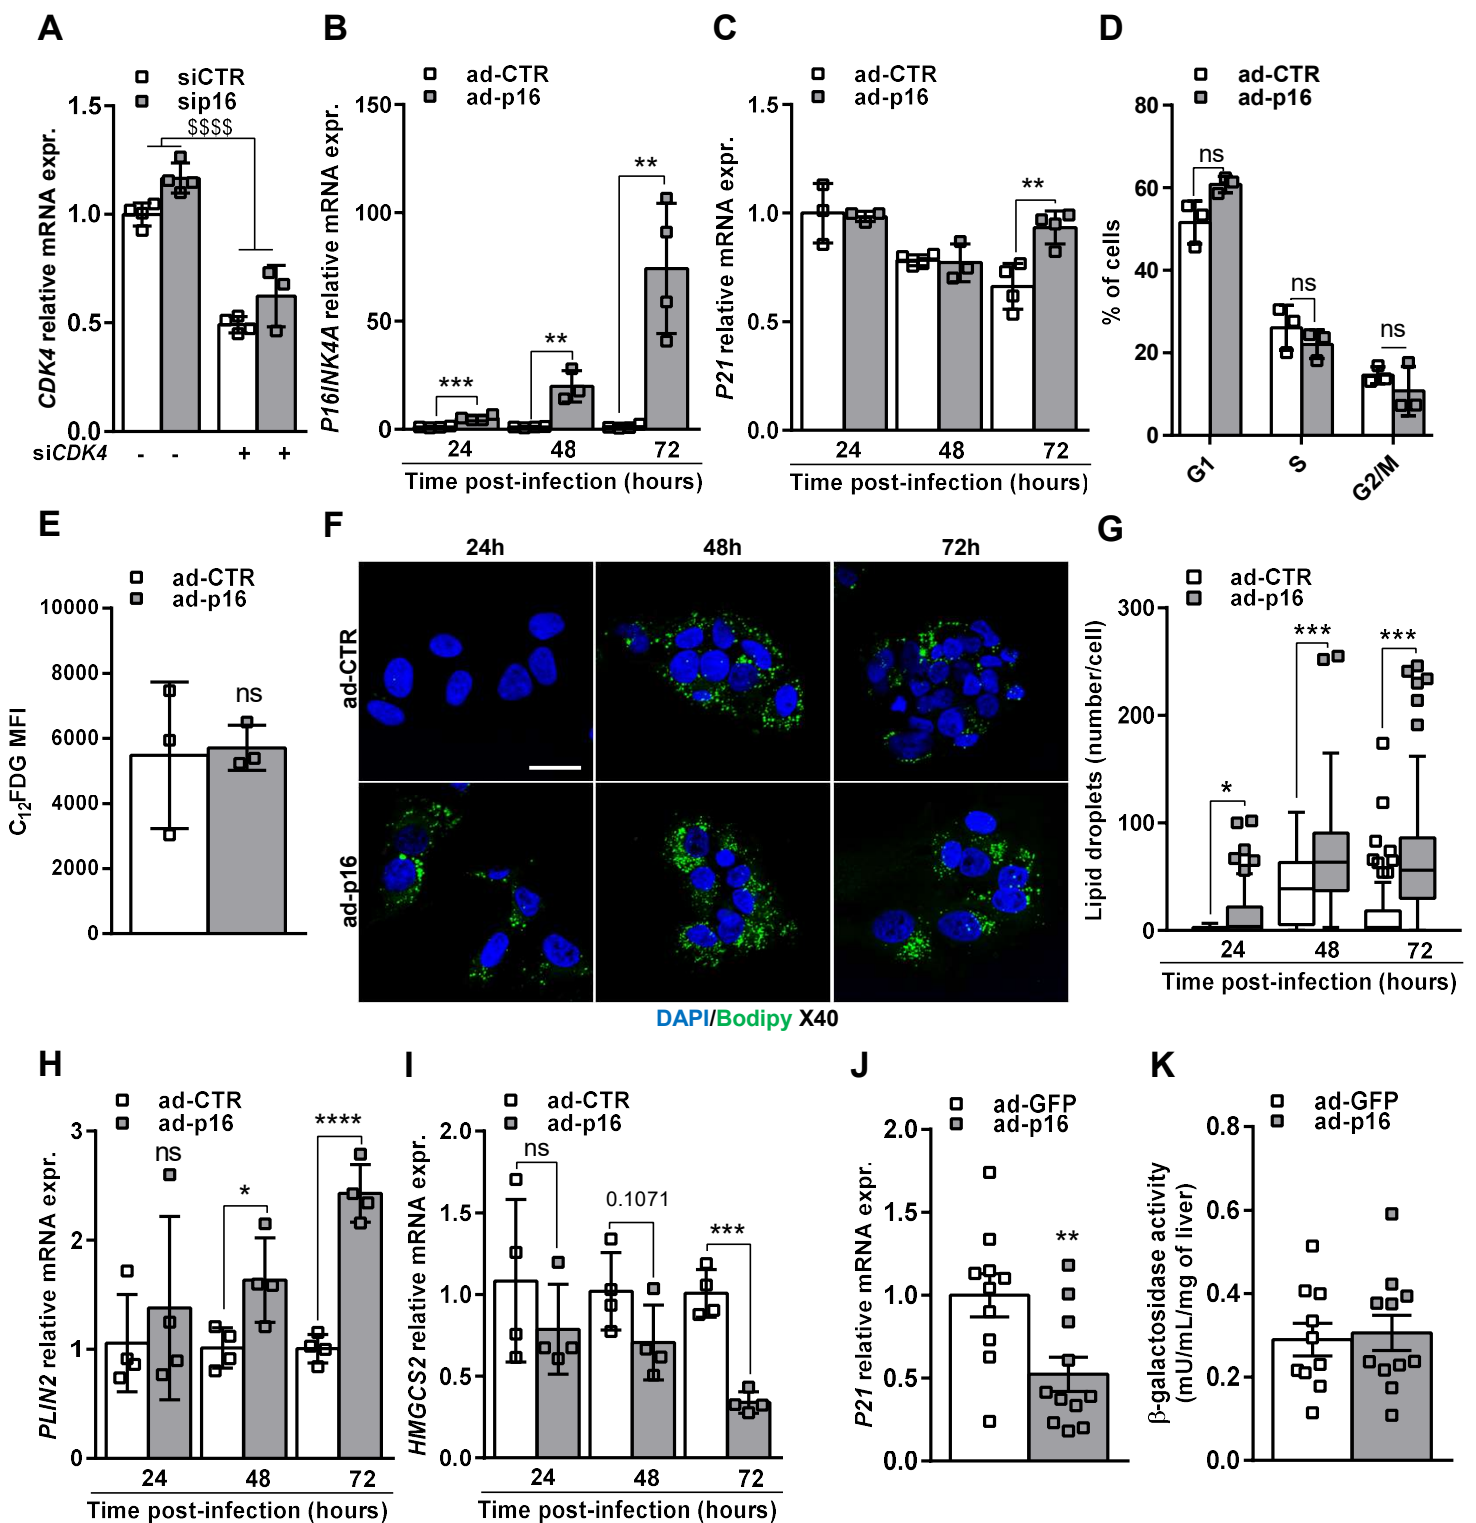

**Figure S4. P16 overexpression does not modulate cell cycle and SA-β-Galactosidase activity in hepatocytes.** (A) *CDK4* relative mRNA expression in IHH cells transfected with siCTR or *sip16* and cotransfected with *siCDK4*. (B-I) HepG2 cell line was infected with ad-CTR or ad-p16 for 24, 48 and 72h, (B) *P16* and (C) *P21* relative mRNA expression were measured by QPCR. (D) Percentage of cells in each phase of the cell cycle after propidium iodide staining were analyzed by FACS after 72h infection. (E) SA-β-Galactosidase activity was measured by C12FDG staining in HepG2 cells infected with ad-CTR or ad-p16 for 72 h. (F) Representative images of BODIPY 493/503 staining of neutral lipids; Scale bar = 20 μm. (G) Quantification of lipid droplets. (H) *PLIN2* and (I) *HMGCS2* relative mRNA expression were measured by QPCR. All values are expressed as means ± SD. \* compared to siCTR of the same condition or ad-CTR, one-way ANOVA: \*\*\*\* p < 0.0001; \*\*\* p < 0.001, \*\* p < 0.01 and \* p < 0.05. \$ compared to siCTR or *sip16* in two different conditions (siCTR or *siCDK4*) \$\$\$\$ p < 0.0001. (J) *P21* relative mRNA expression was measured by QPCR and (K) SA-β-Galactosidase activity was measured using Promokine beta-Galactosidase Activity Assay Kit (Promocell) in livers from ad-GFP (n=10) or ad-p16 (n=11) infected mice. All values are expressed as means ± SEM. \* compared to ad-GFP, unpaired t-test \*\* p < 0.01.

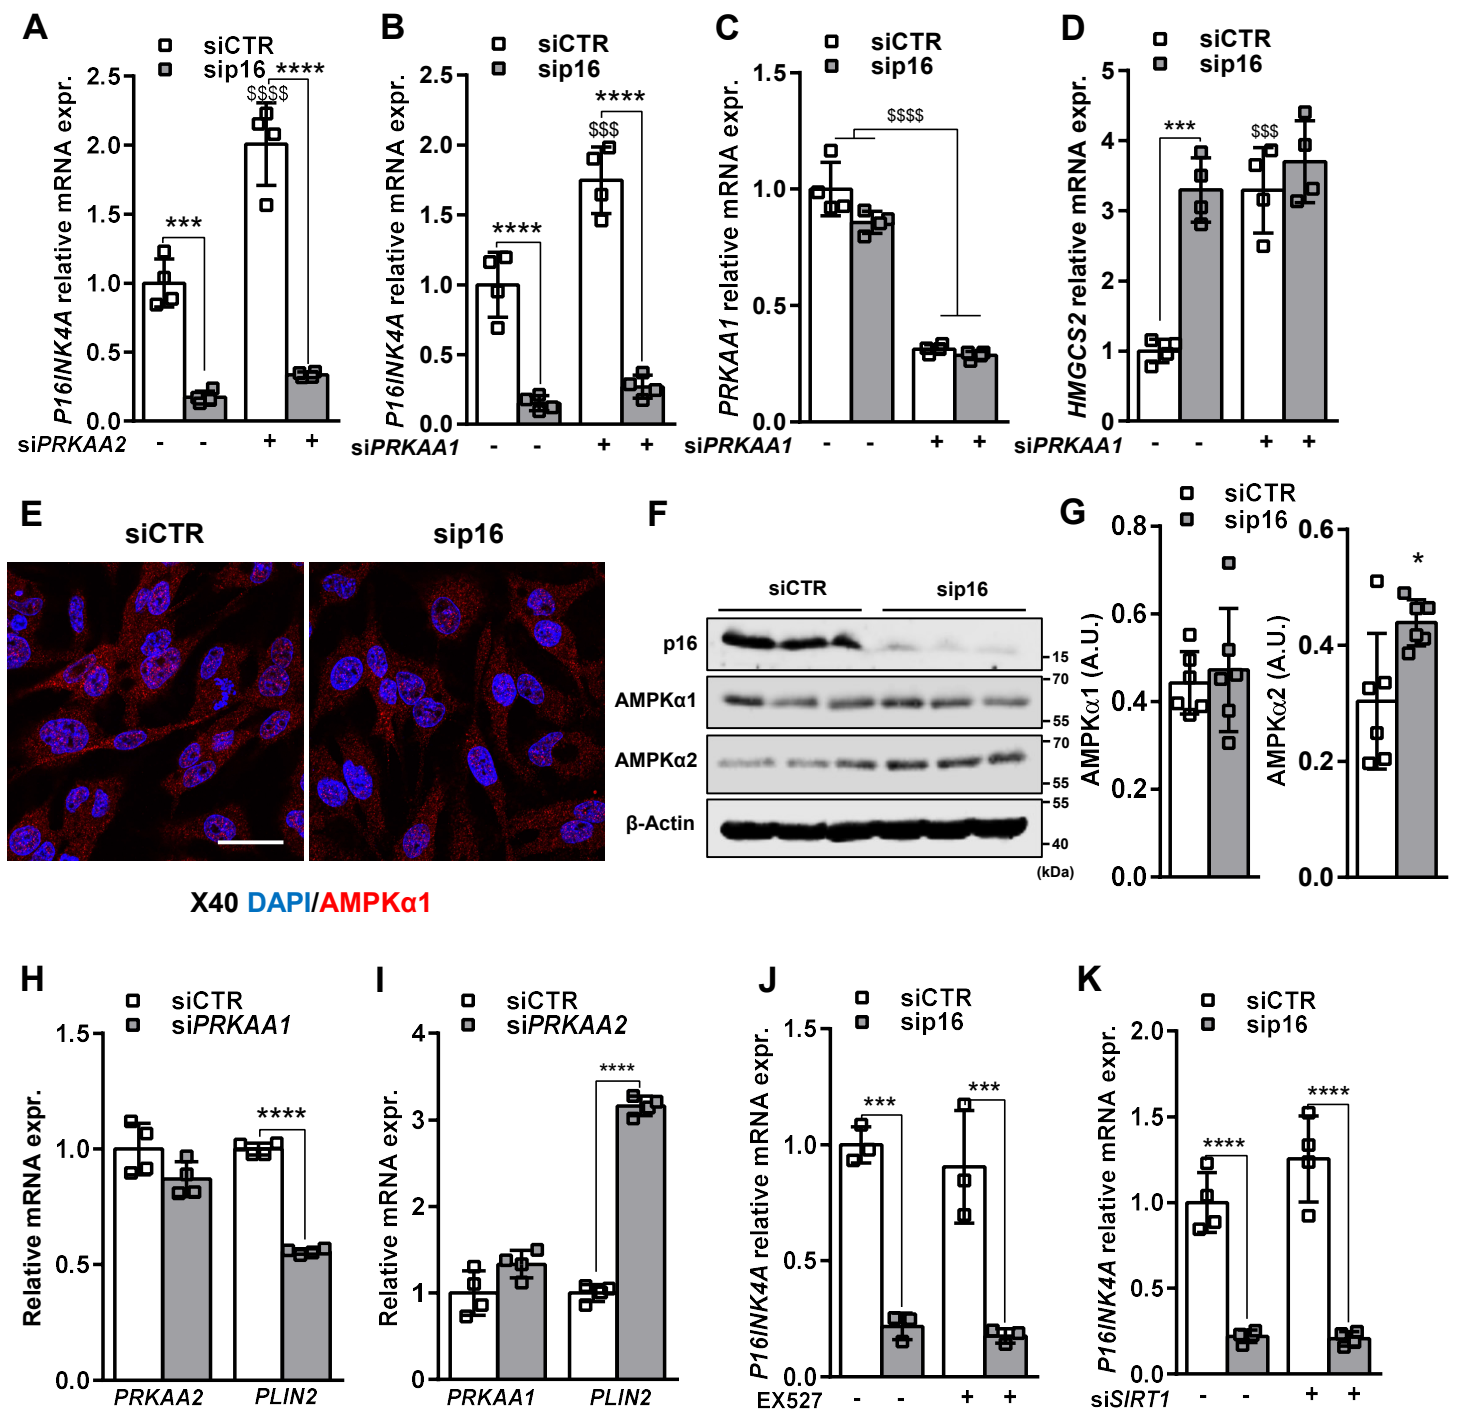

**Figure S5. P16 modulates HMGCS2 expression via activation of AMPK $\alpha$ 2 but not AMPK $\alpha$ 1 in IHH cells.** (A) Relative mRNA expression of *P16* measured by QPCR in IHH cells transfected with siCTR or *sip16* and cotransfected with siPRKAA2. (B) *P16* (C) *PRKAA1* and (D) *HMGCS2* relative mRNA expression measured by QPCR in IHH cells transfected with siCTR or *sip16* and cotransfected with siPRKAA1. (E) Representative images of AMPK $\alpha$ 1 immunofluorescent staining in IHH cells transfected with siCTR or *sip16*. The threshold for red fluorescence was enhanced compared to AMPK $\alpha$ 2 immunofluorescent staining to improve the visibility of AMPK $\alpha$ 1; Scale bar = 20  $\mu$ m. (F) Western blot assay showing the protein levels of p16, AMPK $\alpha$ 1, AMPK $\alpha$ 2 and  $\beta$ -actin and (G) quantification of AMPK $\alpha$ 1 and AMPK $\alpha$ 2 protein levels using  $\beta$ -actin as a loading control (pool of 2 separate experiments) in IHH cells transfected with siCTR or *sip16*. Relative mRNA expression of (H) *PRKAA2* and *PLIN2* and (I) *PRKAA1* and *PLIN2* in IHH cells transfected with siPRKAA1 or siPRKAA2. (J) *P16* and (K) *SIRT1* relative mRNA expression in IHH cells transfected with siCTR or *sip16*, cotreated with EX527 or cotransfected with siSIRT1 respectively. All values are expressed as mean  $\pm$  SD. \* compared to siCTR of the same condition (siCTR, siPRKAA1, siPRKAA2, siSIRT1, DMSO or EX527); one-way ANOVA (A, B, C, D, H, I, J, K) or unpaired t-test (G) : \*\*\*\*  $p < 0.0001$ ; \*\*\*  $p < 0.001$ , \*\*  $p < 0.01$  and \*  $p < 0.05$ ; \$ compared to siCTR or sip16 in two different conditions (siCTR vs siPRKAA1, siCTR vs siPRKAA2, siCTR vs siSIRT1 or DMSO vs EX527) \$\$\$\$  $p < 0.0001$ , \$\$\$  $p < 0.001$ .

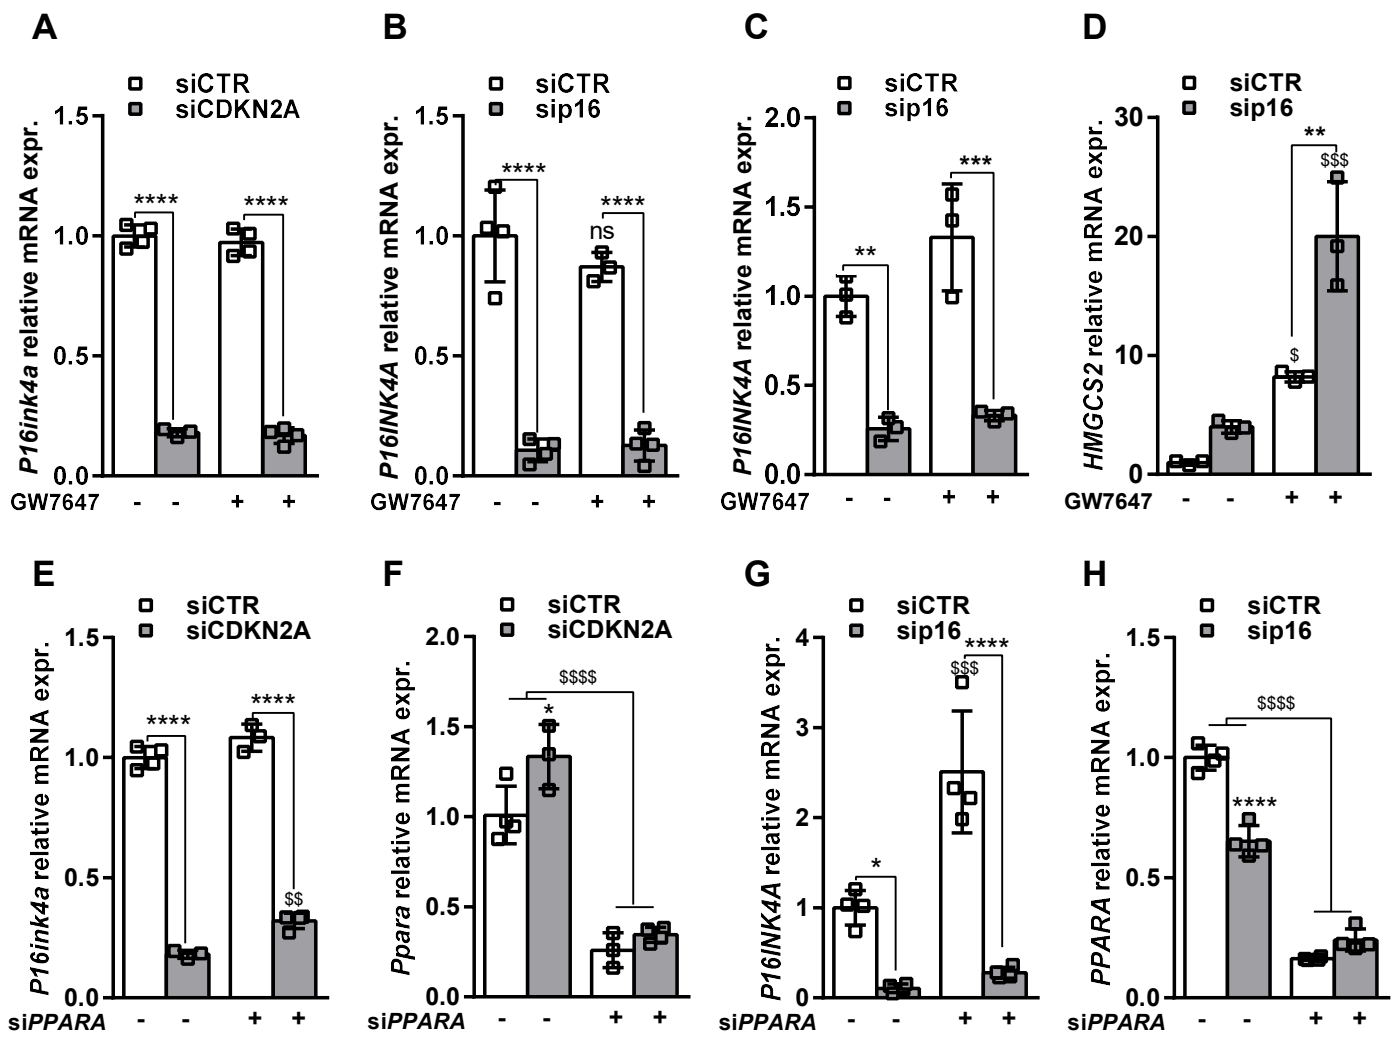

**Figure S6. P16-deficiency increases fatty acid catabolism gene expression via activation of PPAR $\alpha$  in hepatocytes.** (A-B) *P16* relative mRNA expression measured by QPCR in (A) murine AML12 cell line transfected with siCTR or siCDKN2A and (B) in human IHH cell line transfected with siCTR or sip16 and treated with 600 nM GW7647 or DMSO (control) for 8h. (C) *P16* and (D) *HMGC2* relative mRNA expression measured by QPCR in human HepG2 cell line transfected with siCTR or sip16 and treated with 600 nM GW7647 or DMSO. (E) *P16ink4a* and (F) *Ppara* relative mRNA expression measured by QPCR in the murine AML12 cell line transfected with siCTR or siCDKN2A and cotransfected with siPPARA. (G) *P16INK4A* and (H) *PPARA* relative mRNA expression measured by QPCR in the human IHH cell line transfected with siCTR or sip16 and cotransfected with siPPARA. All values are expressed as means  $\pm$  SD. \* compared to siCTR of the same condition (DMSO, GW7647, siCTR or siPPARA); one-way ANOVA: \*\*\*\*  $p < 0.0001$ ; \*\*\*  $p < 0.001$ , \*\*  $p < 0.01$  and \*  $p < 0.05$ ; \$ compared between two different conditions (DMSO vs GW7647 or siCTR vs siPPARA) \$\$\$  $p < 0.0001$ ; \$\$\$  $p < 0.001$ , \$\$  $p < 0.01$  and \$  $p < 0.05$ .

| n = 910 patients                         | <b>median [IQR]</b>  |
|------------------------------------------|----------------------|
| <b>Age (years)</b>                       | 43.0 [33.0, 51.0]    |
| <b>Sex (% men)</b>                       | 27.6%                |
| <b>Weight (kg)</b>                       | 129.0 [114.0, 146.0] |
| <b>BMI (kg/m<sup>2</sup>)</b>            | 45.8 [41.3, 51.3]    |
| <b>HbA<sub>1c</sub></b>                  | 5.9 [5.5, 6.6]       |
| <b>HOMA2</b>                             | 1.36 [0.47, 2.35]    |
|                                          |                      |
| <b>Fasting Glucose (mmol/L)</b>          | 5.6 [5.1, 6.8]       |
| <b>Plasma Triglycerides (mmol/L)</b>     | 1.4 [1.1, 1.9]       |
| <b>Plasma Total Cholesterol (mmol/L)</b> | 4.9 [4.3, 5.5]       |
| <b>Plasma HDL-C (mmol/L)</b>             | 1.1 [1.0, 1.3]       |

**Table S1: Clinical parameters of obese patients used for liver transcriptomic analysis**

## SUPPLEMENTARY METHODS

### SiRNA

| Name             | Sequence/reference                                     | supplier          |
|------------------|--------------------------------------------------------|-------------------|
| <b>MOUSE</b>     |                                                        |                   |
| Control-F        | D-001810-10 Dharmacon ON-TARGETplus Non-targeting Pool | Horizon           |
| Control-R        |                                                        |                   |
| CDKN2A-F         | L-043107-00 Dharmacon SMARTpool ON-TARGETplus          | Horizon           |
| CDKN2A-R         |                                                        |                   |
| PPAR $\alpha$ -F | L-040740-01 Dharmacon SMARTpool: ON-TARGETplus         | Horizon           |
| PPAR $\alpha$ -R |                                                        |                   |
| <b>HUMAN</b>     |                                                        |                   |
| Control-F        | AGGUAGUGUAAUCGCCUUG                                    | EUROFINS GENOMICS |
| Control-R        | CAAGGCGAUUACACUACCU                                    |                   |
| P16-F            | CGCACCGAAUAGUUACGGU                                    | EUROFINS GENOMICS |
| P16-R            | ACCGUAACUAUUCGGUGCG                                    |                   |
| PPAR $\alpha$ -F | CUUCUUUCGGCGAACGAUU                                    | EUROFINS GENOMICS |
| PPAR $\alpha$ -R | AAUCGUUCGCCGAAAGAAG                                    |                   |
| CDK4-F           | M-003238-02 Dharmacon siGENOME                         | Horizon           |
| CDK4-R           |                                                        |                   |
| PRKAA1-F         | M-005027 Dharmacon SMARTPOOL siGENOME                  | Horizon           |
| PRKAA1-R         |                                                        |                   |
| PRKAA2-F         | M-005361 Dharmacon SMARTpool siGENOME                  | Horizon           |
| PRKAA2-R         |                                                        |                   |
| SIRT1-F          | M-003540 Dharmacon SMARTpool siGENOME                  | Horizon           |
| SIRT1-R          |                                                        |                   |

### QPCR primers

| Name                     | Sequence                  |
|--------------------------|---------------------------|
| <b>HOUSEKEEPING GENE</b> |                           |
| Cyclophilin-F            | GCATACGGGTCTTGGCATCTTGCC  |
| Cyclophilin-R            | ATGGTGATCTTCTTGCTGGTCTTGC |
| <b>MOUSE</b>             |                           |
| P16-F                    | TTGAGCAGAAGAGCTGCTACGT    |
| P16-R                    | CGTACCCCGATTGAGGTGAT      |
| PPAR $\alpha$ -F         | ATCGCGTACGGCAATGGCTTTA    |
| PPAR $\alpha$ -R         | CAGGCCGATCTCCACAGCAAATTA  |
| HMGCS2-F                 | CAGCCTCCCTCTTCAATGCT      |
| HMGCS2-R                 | ACCACTCGGGTAGACTGCAA      |
| BDH1-F                   | GCGCACCACAAAATCCTTCC      |
| BDH1-R                   | TGGTGATGCAGTATGGCGAG      |
| CPT1 $\alpha$ -F         | CATCATGACTATGCGCTACTC     |
| CPT1 $\alpha$ -R         | CAGTGCTGTCATGCGTTGG       |
| EHHADH-F                 | TTGCCAATGCAAAGGCTCGT      |
| EHHADH-R                 | GCAACAGGAACTCCAACGAC      |
| PLIN2-F                  | GATTGAATTCGCCAGGAAGA      |
| PLIN2-R                  | TGGCATGTAGTCTGGAGCTG      |



|                  |                           |
|------------------|---------------------------|
| P21-F            | GTGGCCTTGTGCTGTCT         |
| P21-R            | GACCAATCTGCGCTTGAGTG      |
| <b>HUMAN</b>     |                           |
| P16-F            | GAGCAGCATGGAGCCTTC        |
| P16-R            | GGCTCCGACCGTAACTATT       |
| PPAR $\alpha$ -F | CCAGCGTCTTCTCAGCCATACACAG |
| PPAR $\alpha$ -R | TTTCTGTCGGGATGTCACACAACG  |
| HMGCS2-F         | AGGCTGGAAGTAGGCACTGA      |
| HMGCS2-R         | GTGGGACGAGCATTACCACT      |
| PLIN2-F          | GGGCTAGACAGGATTGAGGA      |
| PLIN2-R          | GCCCCAGTCACAGTAGTCGT      |
| CPT1 $\alpha$ -F | TCTGGCTGGACATGCAGTTGGC    |
| CPT1 $\alpha$ -R | TATCGTGGTGGTGGGCGTGATG    |
| EHHADH-F         | GGTCAACGCGATCAGTACGAC     |
| EHHADH-R         | CTGAAGCCACGAATATCAGCAC    |
| PRKAA1-F         | GGCTCACCCAACTATGCTG       |
| PRKAA1-R         | GAGAATAACCCCACTGCTCCA     |
| PRKAA2-F         | GCAGCACCTGAAGTCATCTC      |
| PRKAA2-R         | TCATCAAATGGGAGGGTGCC      |
| CDK4-F           | GTGGACATGTGGAGTGTGG       |
| CDK4-R           | CGGCTTCAGAGTTTCCACAG      |
| SIRT1-F          | GCAGATTAGTAGGCGGCTTG      |
| SIRT1-R          | TCTGGCATGTCCCACTATCA      |

### **Oxygen consumption profile.**

Basal oxygen consumption rate (OCR) was normalized by subtracting the minimum rate after rotenone and antimycin A addition. The remaining oxygen consumption referred to non-mitochondrial OCR. ATP production-linked oxygen consumption was calculated as the difference between basal oxygen consumption and OCR, measured after the addition of oligomycin. Proton leak was calculated as the difference between OCR obtained after the addition of oligomycin and non-mitochondrial OCR. Maximal OCR was determined by subtraction the non-mitochondrial OCR from the maximal OCR reading after the addition of FCCP. The spare respiratory capacity was calculated by subtraction basal OCR from maximum OCR.

### **$\beta$ -Galactosidase activity analysis**

Beta-galactosidase activity assays were performed using the Promokine Assay Kit (Promocell) according to the manufacturer's instructions. Briefly, five milligrams of liver from each mouse were weighed and lysed in 100  $\mu$ L of beta-Gal Assay Buffer, followed by centrifugation at 10,000g for 5 min at 4°C. The supernatants of each sample were loaded in duplicate in a 96-well plate and diluted 1:2.5 in the beta-Gal Assay Buffer. The fluorescein standard and the beta-Gal Positive Control were prepared as described in the protocol and loaded in duplicate. Immediately after addition of the Reaction Mix to the wells, the plate was loaded in a SpectraMax® i3 microplate reader (Molecular Devices). Fluorescence was measured (Ex/Em = 480/520 nm) every 5 min for 30 or 60 min at 37°C. The measures from T20min and T30min

were used for the calculation of beta-Galactosidase activity. Data are presented as mU/mL/mg of liver.

### **Senescence-Associated (SA)- $\beta$ -Galactosidase staining**

C12FDG (Invitrogen) and SA- $\beta$ -Galactosidase (Thermo fisher) staining were done according to Debacq-Chainiaux et al. (45). C12FDG fluorescence was analyzed with blue laser 488 nm and 530 nm emission filter by flow cytometry with BD LSR Fortessa X-20 cell analyzer (BD Biosciences). SA- $\beta$ Gal activity related to C12FDG staining was estimated using the mean fluorescence intensity (MFI) of the live single-cell population after removing autofluorescence. SA- $\beta$ -Galactosidase positive cells were counted in 15 fields with phase-contrast microscopy.
